# Supplementary material
Source: publisher figshare collection journal article supplement (https://frontiersin.figshare.com/ndownloader/files/22024428)
Supplement: Supplementary file [file 22024428]

## Supplementary Material

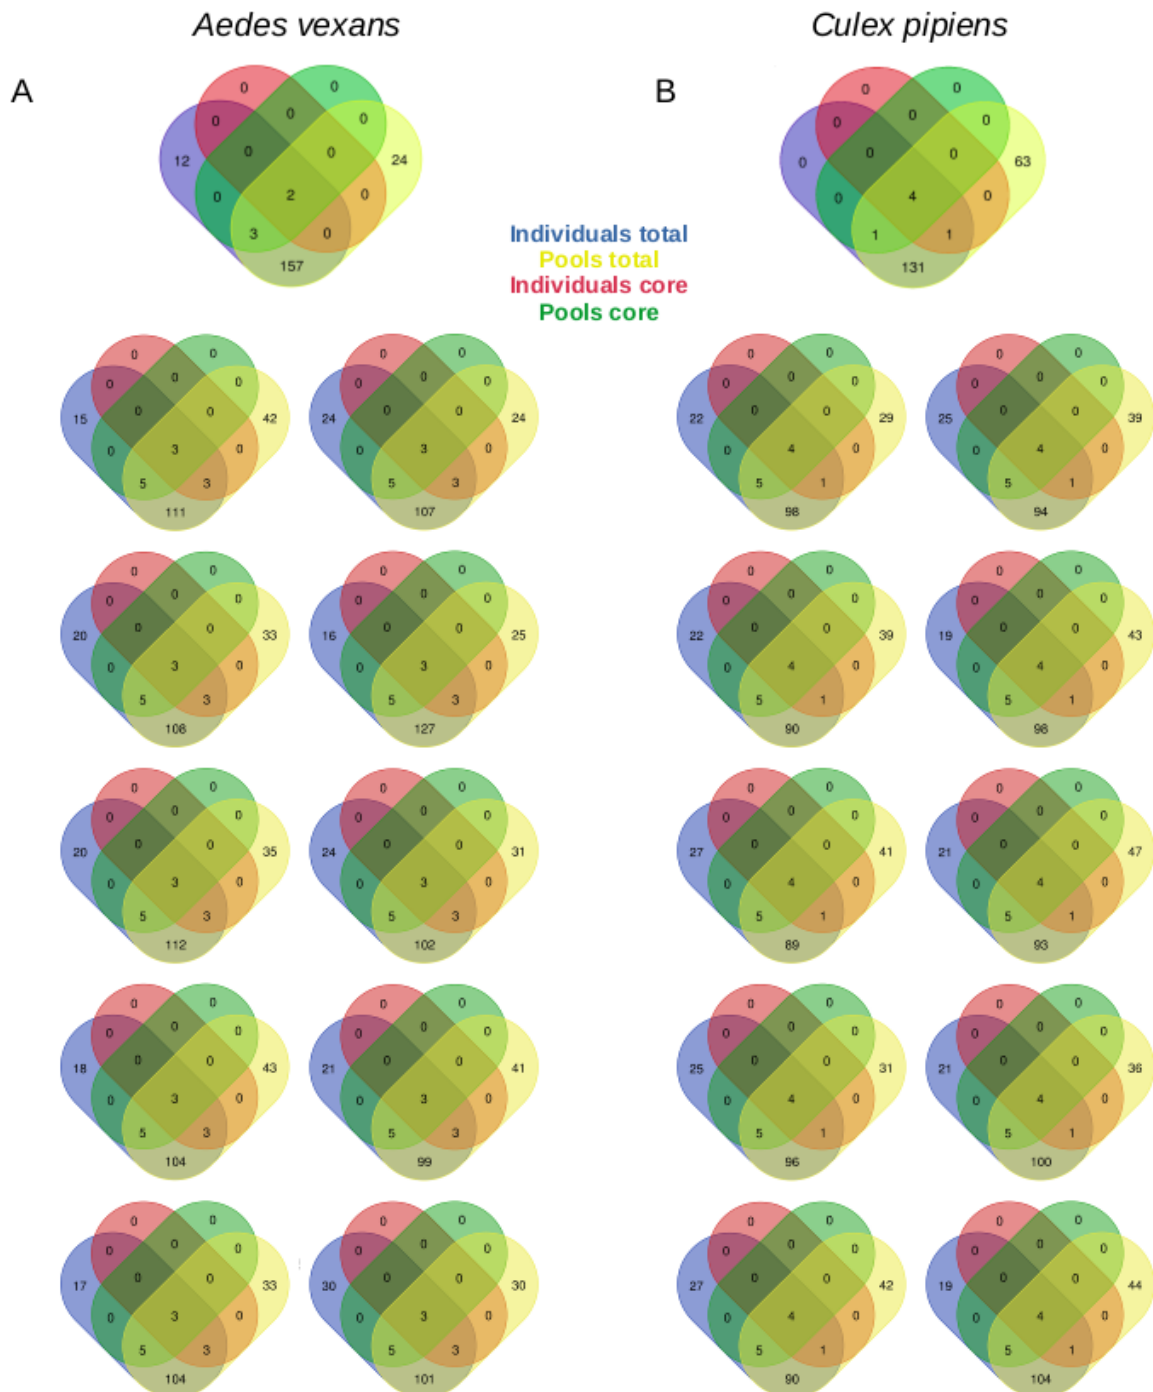

**Supplementary Figure 4.** Venn diagrams comparing the number of OTUs present in individual vs. pooled samples, both in total and in the core microbiome for A) *Aedes vexans* and B) *Culex pipiens*, using 10 randomly sub-sampled data sets ( $n = 10$  for each group). The results for the full data set presented in the main text are also shown at the top of the figure for easier comparison.
